# Supplementary material
Source: publisher site journal article supplement (https://www.dovepress.com/article/256689)
Supplement: Supplementary file 1 [file get_supplementary_file.php]

**Supplementary Tables**

**Supplementary Table 1:** Measures that have detected early cognitive involvement in MS by broad cognitive domain in at least 10% of the sample or in comparison to a healthy control group

BVMT-R: Brief Visuospatial Memory Test-Revised; CDR: Cognitive Drug Research; COWAT: Controlled Oral Word Association Test; CVLT-II: California Verbal Learning Test-Second Edition; DCS: Visual Learning and Memory Test for Neuropsychological Assessment; D-KEFS: Delis-Kaplan Executive Function System; RAVLT: Rey Auditory Verbal Learning Test; RVDLT: Rey Visual Design Learning Test; SDMT: Symbol Digit Modalities Test; SLP: Standardisierte Linksche Probe zur Beurteilung exekutiver Funktionen; SPART: Spatial Recall Test; SRT: Selective Reminding Test; TAP: Tests of Attentional Performance; TMT: Trail Making Test; VLMT: Verbaler Lern-und Merkfähigkeitstest; WAIS: Wechsler Adult Intelligence Scale; WISC: Wechsler Intelligence Scale for Children; WLG: Word List Generation; WMS: Wechsler Memory Scale

| **Domains** | **Measures/Tasks** |
| --- | --- |
| Attention and Processing Speed | CogniSpeed—Simple Reaction Time15 |
| Complex Focused Attention—Reaction Time14 |
| Reaction Unit/Vienna System—Simple Reaction Time127 |
| TMT-A12,42,74,100 |
| Reaction Unit/Vienna System—Interference Reaction Time127 |
| CogniSpeed—Subtraction Time15 |
| TAP—Tonic Alertness43,119 |
| TAP—Phasic Alertness43,119 |
| TAP—Go/Nogo43 |
| TAP--Flexibility43 |
| TAP—Divided Attention Speed29,43 |
| Computerized Inhibition Task—Reaction Time137 |
| CDR—Power of Attention53 |
| CDR—Speed of Memory53 |
| Mesulam Cancellation Test27 |
| Non-Verbal Cancellation Test101 |
| WAIS/WISC Coding140 |
| SDMT13,22,26-28,30,31,33,34,36,41,44-46,48,57,59,62,64,65,68,70,76,82,86,94,97,107,109,113,114,118,127,135,140,142-144,148,151,156 |
| Working Memory | PASAT-313,16,18,22,26,30,31,33,34,37,41,42,44,54,57,59,62,64,65,82,90,94,99,101,118,126,129,148,152 |
| PASAT-212,16,26,30,31,34,41,59,61,63,64,66,70,82,129 |
| TAP—Working Memory43 |
| Digit Span Forwards37,42,48,95,137,148 |
| Digit Span Backwards27,37,42 |
| WMS Block Span Forward43 |
| WMS Block Span Backwards43 |
| Corsi Block Tapping Test132,140 |
| WAIS/WISC Arithmetic140 |
| Serial Digit Learning Test101 |
| Verbal Learning and Memory | CVLT-II-Total30,85,113,151 |
| RAVLT-Total12,118,125,148 |
| SRT-Total27,59 |
| Free and Cued Recall Test-Immediate Free Recall42 |
| VLMT-Learning43,140 |
| Randt’s Memory Battery—Paired Words Acquisition132 |
| WMS Logical Memory-Immediate126,127 |
| Adult Memory and Information Processing Battery—Story Recall-Immediate45 |
| CVLT-II-Delayed30 |
| RAVLT-Delayed12,101,118,125,126,148 |
| SRT-Long Term Storage13,31,34,41,48,62,64,68,71,129 |
| SRT-Consistent Long Term Retrieval13,22,31,34,41,44,62,71,135 |
| SRT-Delayed13,21,22,31,34,41,48,59,62,64,65,71,82,129 |
| Free and Cued Recall Test-Delayed Free Recall42 |
| VLMT-Delayed43,140 |
| Randt’s Memory Battery—Five Items 10-minute Recall132 |
| Randt’s Memory Battery—Five Items 24-hour Recall132 |
| Randt’s Memory Battery—Paired Words 10-minute Recall132 |
| Randt’s Memory Battery—Paired Words 24-hour Recall132 |
| WMS Logical Memory-Long-Term Delay95,126,127 |
| Adult Memory and Information Processing Battery—Story Recall-Delayed36,45 |
| Visual Learning and Memory | BVMT-R-Total30,46,59,85,113,118,148,151 |
| SPART-Total13,21,27,42,62,64,82,94 |
| Adult Memory and Information Processing Battery—Figure Recall-Immediate36,45 |
| WMS Visual Reproduction Test-Immediate127 |
| DCS-Learning29 |
| Benton Facial Recognition Test101 |
| RVDLT-Learning43 |
| BVMT-R-Delayed30,59,131,148 |
| SPART-Delayed13,21,22,31,34,41,42,62,64,65,68,129 |
| Adult Memory and Information Processing Battery—Figure Recall-Delayed36,45 |
| WMS Visual Reproduction Test-Delayed95,127 |
| Kimura’s Recurring-Figures Test116,141 |
| Rey Complex Figure Delay101,119 |
| Visuospatial Ability | Rey Complex Figure Copy27,43,97,101 |
| Judgment of Line Orientation30,101,148 |
| WAIS Block Design116,141 |
| Executive Functioning | Stroop Test12,17,34,41,101,107,127,139,156 or Modified Stroop Task18 |
| TMT-B12,37,42,74,100,107,118,148 |
| Tower of London27 |
| D-KEFS Sorting30 |
| D-KEFS Design Fluency140 |
| Modified Card Sorting Test43 |
| WAIS/WISC Similarities31,34,41,140 |
| WAIS/WISC Matrix Reasoning140 |
| Raven Progressive Matrices101,132 |
| Hotel Task126 |
| Iowa Gambling Task126 |
| Multiple Errand Test126 |
| Hayling Sentence Completion Task36,45 |
| Brixton Spatial Anticipation Test26 |
| SLP43 |
| Language | Phonemic fluency (eg, COWAT)12,23,27,30,38,42,57,61-63,66,74,101,118,148 |
| Semantic fluency (eg, WLG)13,16,17,21,27,29,41,42,59,62,64,65,76,82,94,97 |
| Boston Naming Test27,41,97,101 |
| Tübingen Affect Battery123 |
| WAIS/WISC Comprehension140 |
| WAIS/WISC Vocabulary140 |
| WAIS/WISC Information140 |
| Theory of Mind | Movie for the Assessment of Social Cognition124 |
